# Supplementary material
Source: publisher figshare collection journal article supplement (https://acs.figshare.com/ndownloader/files/3937708)
Supplement: Supplementary file 1 [file 3937708]

*Supporting Information for:*

**Biotransformation of Trace Organic Contaminants in  
Open-Water Unit Process Treatment Wetlands**

Justin T. Jasper<sup>1,2</sup>, Zackary L. Jones<sup>1,3</sup>, Jonathan O. Sharp<sup>1,3</sup>, David L. Sedlak<sup>1,2\*</sup>

<sup>1</sup>ReNUWIt Engineering Research Center

<sup>2</sup>Department of Civil & Environmental Engineering  
University of California at Berkeley  
Berkeley, CA 94720

<sup>3</sup>Department of Civil & Environmental Engineering  
Colorado School of Mines  
Golden, CO 80401

*20 pages*  
*10 figures*  
*4 tables*

\*corresponding author: Contact information: e-mail: [sedlak@berkeley.edu](mailto:sedlak@berkeley.edu)

## **Details of microcosm sampling**

Triplicate microcosms containing unbuffered wetland water ( $[\text{DOC}] \approx 8 \text{ mg C L}^{-1}$ ;  $[\text{NO}_3^-] \approx 10 \text{ mg N L}^{-1}$ ) were amended with all six test compounds ( $5 \text{ } \mu\text{g L}^{-1}$ ) and sampled at regular intervals throughout the experiment. 1 mL aqueous samples were filtered through  $1 \text{ } \mu\text{m}$  glass-fiber Acrodisc syringe filters (Pall Corporation), amended with about 2.5 ng of each isotopically-labeled internal standard, and refrigerated until analysis (within 1 week). Test compounds were extracted from dewatered (centrifuged at 5,000 RPM, 10 minutes), wet biomat samples (about 0.1 g dry weight). Samples were agitated for approximately 8 hours on a rotisserie in 15 mL of methanol amended with about 2.5 ng of each isotopically-labeled internal standard. Methanol extracts were filtered ( $1 \text{ } \mu\text{m}$  glass-fiber; Millipore, Bellerica, MA) and diluted to 1 L with deionized water prior to clean-up and concentration via solid phase extraction (SPE). The SPE media consisted of 50 mg Waters Oasis hydrophilic-lipophilic balance (HLB) in cartridges pretreated with 10 mL of methanol, followed by 10 mL of Milli-Q water. Cartridges were eluted with 12 mL of methanol, dried under a gentle nitrogen stream, and re-suspended in 1 mL of Milli-Q water prior to analysis via HPLC-MS-MS.

## **Details of pilot-scale wetland sampling**

Aqueous samples were collected in 1 L, baked amber glass bottles, filtered through  $1 \text{ } \mu\text{m}$  glass fiber filters and refrigerated prior to analysis. 400 mL samples were amended with approximately 10 ng of isotopically-labeled internal standards and extracted via SPE, as described above, prior to analysis. In some cases, 1 mL samples were amended with 2.5 ng of isotopically-labeled internal standards, and analyzed by HPLC-MS/MS with direct injection of either 100  $\mu\text{L}$  or 800  $\mu\text{L}$  sample aliquots. Samples were analyzed within 3 days of collection.

Test compounds were extracted from biomat samples collected throughout the pilot-scale wetland using methanol, as described above.

## **Details of DNA Extraction, Sequencing, and Clone Library Creation**

Approximately 1 g of biomass was sampled from dark microcosms and microcosms illuminated with visible light (635 nm) at the beginning, middle, and end of biotransformation experiments. Samples were shipped overnight on dry ice and stored at -80° C prior to extraction. DNA was extracted from 0.25g of sample using the Mo Bio PowerBiofilm DNA Isolation Kit per manufacturer's protocol. Extracted DNA was amplified in triplicate 25 µl reactions without Illumina adaptors or primers pads on a Roche LightCycler 480II. A portion of the 16S rRNA gene was amplified using Phusion Master Mix (New England BioLabs, Inc), 3% final volume DMSO, 0.4x final concentration SYBR Green, 200nM 515F (5' GTGYCAGCMGCCGCGGTAA 3'),<sup>1</sup> and 12bp Golay barcoded 806R (5'XXXXXXXXXXXXCCGGACTACHVGGGTWTCTAAT 3').<sup>2</sup> The amplification program was: 94°C 3 min; 94°C 45 sec , 50°C 10 sec, 72°C 90 sec. The program was stopped after all samples had amplified. Triplicates were pooled and purified using Agencourt AMPure XP and quantified using a Life Sciences Qubit 2.0 Fluorometer. Normalized amplicons were sequenced on the Illumina MiSeq platform using NEBNext Ultra DNA Library Prep Kit and a MiSeq Reagent Kits v2 2x250 500 cycle kit.

The sets of 250 bp sequences were stitched together using ea-utils<sup>3</sup> fastq-join with a minimum base pair overlap of 100. Stitched sequences were reverse complimented with the fastx toolkit<sup>4</sup> in order to account for sequences that were sequenced in the reverse direction. The resulting sequences were processed in QIIME 1.7 dev<sup>5</sup> starting with sl\_prep\_fastq.py to create a

barcode .fastq file. The resulting sequence and barcode file were demultiplexed using split\_libraries\_fastq.py with default parameters, except for “--barcode 12”, to negate error correcting of barcodes, as any sequences with errors would have been filtered out by sl\_prep\_fastq.py. Otus were piked *de novo* using Usearch 6.1<sup>6</sup> and chimeras were filtered out using the Greengenes gold database<sup>7</sup>. Representative sequences were aligned using PyNAST<sup>8</sup> and greengenes 13\_5 aligned reference database. Taxonomy was assigned using the RDP classifier and greengenes 13\_5 97 otu taxonomy database and the otu table was then rarified to 5050 sequences before further analysis. All phyla with less than 1% relative abundance were filtered out.

DNA for the 23S rRNA gene algal clone library was extracted in the same way as the microcosm samples and amplified with p23SrV\_f1 and p23SrV\_r1, GGA CAG AAA GAC CCT ATG AA, and TCA GCC TGT TAT CCC TAG AG, respectively, with the published amplification protocol.<sup>9</sup> Amplicon was purified via gel electrophoresis using the E. Z. N. A. gel extraction kit (Omega). Purified amplicon was then transformed into electro-competent *E. coli* cells using the TOPO TA Cloning kit (Invitrogen) per manufacture’s instruction. Individual clones were Sanger sequenced by Wyzer Biosciences, Inc (Cambridge, MA). Sequences were analyzed in Geneious v6.0 and trimmed using default quality settings. After trimming any sequences with <90% high quality base scores were excluded from alignment. High quality sequences (16 out of 23) were aligned using the multiple alignment tool with default settings.

#### **Details of HPLC-MS-MS Analysis**

Trace organic compounds were separated by an Agilent 1200 HPLC using a 2.1 mm x 30 mm Zorbax SB-C18 3.5 µm column, eluted with 0.5 mL min<sup>-1</sup> acetonitrile and 0.1%

acetic acid in water with the following gradient: 0 minutes, 5% acetonitrile; 5.5 minutes 55% acetonitrile; 6 minutes, 100% acetonitrile; 9 minutes, 100% acetonitrile; 10 minutes, 5% acetonitrile. Compounds were detected with an Agilent 6460 MS-MS using electrospray ionization (ESI) with a gas temperature of 350°C, a sheath gas temperature of 400°C, a gas flow rate of 11 L/min at 50 psi, and a capillary voltage of 3600 V. Compound-specific parameters are given in Table SI 1.

### Details of Corrections for Evaporation

The effect of evaporation in the open-water cell can be accounted for by including an extra term in the calculation of the first-order rate constant,  $k$ , according to:

$$\ln\left(F\frac{C}{C_0}\right) = -kt$$

where  $C$  and  $C_0$  are the concentration at time  $t$  and the initial concentration, respectively, and  $F$  is the fraction of water remaining after evaporation ( $F < 1$ ). This equation may be rearranged to give:

$$k = -\frac{\ln(F)}{t} - \frac{\ln\left(\frac{C}{C_0}\right)}{t} = -\frac{\ln(F)}{t} + k_{\text{obs}}$$

where  $k_{\text{obs}}$  is the pseudo first-order removal rate of a compound observed in the wetland. Thus,

$$k_{\text{obs}} = k + \frac{\ln(F)}{t}$$

where  $\frac{\ln(F)}{t} < 0$  and corrects for evaporation. Approximately 10% evaporation (i.e.,  $F=0.9$ ), quantified using increases in chloride concentrations, was typical during summer between the cell inlet and outlet (Figure SI 9). Based on a residence time of 1.5 days,  $\frac{\ln(F)}{t} = -0.07 \text{ d}^{-1}$ .

128 **Table SI 1.** Compound-Specific Mass Spectrometry Parameters<sup>a</sup>

| compound                                | precursor ion (amu) | fragmentor voltage (V) | product ions (amu) | collision energy (V) | cell accelerator (V) | ionization mode       |
|-----------------------------------------|---------------------|------------------------|--------------------|----------------------|----------------------|-----------------------|
| 1-naphthoxy acetic acid                 | 201                 | 80                     | 143<br>115         | 15<br>45             | 0<br>5               | negative <sup>b</sup> |
| 4-OH-propranolol                        | 276                 | 115                    | 173<br>116         | 15<br>15             | 5<br>5               | positive <sup>c</sup> |
| Atenolol                                | 267                 | 130                    | 145<br>190         | 24<br>16             | 7                    | positive              |
| Atenolol-d <sub>7</sub>                 | 274                 | 130                    | 145                | 24                   | 7                    | positive              |
| Carbamazepine                           | 237                 | 120                    | 179<br>194         | 35<br>15             | 7                    | positive              |
| Carbamazepine-d <sub>10</sub>           | 247                 | 120                    | 204                | 20                   | 7                    | positive              |
| Metoprolol                              | 268                 | 130                    | 159<br>116         | 17<br>14             | 7                    | positive              |
| Metoprolol-d <sub>7</sub>               | 275                 | 130                    | 123<br>159         | 14<br>17             | 7                    | positive              |
| Metoprolol- $\alpha$ -OH                | 284                 | 130                    | 116<br>74          | 15<br>15             | 7                    | positive              |
| Metoprolol- $\alpha$ -OH-d <sub>5</sub> | 289                 | 135                    | 121                | 15                   | 5                    | positive              |
| Metoprolol acid                         | 268                 | 130                    | 191<br>145         | 17<br>25             | 7                    | positive              |
| Metoprolol acid-d <sub>5</sub>          | 273                 | 130                    | 196                | 17                   | 7                    | positive              |
| Nor propranolol                         | 218                 | 100                    | 155<br>127         | 15<br>45             | 5                    | positive              |
| Nor propranolol-d <sub>7</sub>          | 255                 | 100                    | 189                | 12                   | 5                    | positive              |
| Propranolol                             | 260                 | 98                     | 116<br>183         | 13<br>12             | 7                    | positive              |
| Propranolol-d <sub>7</sub>              | 267                 | 98                     | 116                | 13                   | 7                    | positive              |
| Sulfamethoxazole                        | 254                 | 110                    | 92<br>156          | 25<br>10             | 7                    | positive              |
| Sulfamethoxazole-d <sub>4</sub>         | 258                 | 110                    | 96                 | 25                   | 7                    | positive              |
| Trimethoprim                            | 291                 | 140                    | 123<br>261         | 20<br>17             | 7                    | positive              |
| Trimethoprim-d <sub>3</sub>             | 294                 | 140                    | 123                | 20                   | 7                    | positive              |

129 <sup>a</sup>All compounds were analyzed using a drying gas temperature of 350 ° C, a gas flow of 12 L min<sup>-1</sup>, a nebulizer  
130 pressure of 60 psi, a sheath gas temperature of 400 ° C, a sheath gas flow of 12 L min<sup>-1</sup>, and a nozzle voltage of 300  
131 V. <sup>b</sup>Compounds analyzed by positive ionization used a capillary voltage of 3600 V. <sup>c</sup>Compounds analyzed by  
132 negative ionization used a capillary voltage of 4500 V.

133

**Table SI 2.** Average Aqueous Test Compound Concentrations of Trace Organic Compounds in the Pilot-Scale Open-Water Cell

| <b>Compound</b>  | <b>Concentration (ng L<sup>-1</sup>)<sup>a</sup></b> |                |               |                |               |
|------------------|------------------------------------------------------|----------------|---------------|----------------|---------------|
|                  | <i>Inlet</i>                                         | <i>Point 1</i> | <i>Middle</i> | <i>Point 3</i> | <i>Outlet</i> |
| Atenolol         | 100±10                                               | 31±4           | 19±3          | 7.7±1.6        | 3.3±0.9       |
| Metoprolol       | 58±3                                                 | 38±3           | 30±3          | 20±3           | 8.6±0.9       |
| Propranolol      | 41±2                                                 | 23±3           | 16±2          | 10±1           | 4.5±0.6       |
| Trimethoprim     | 8.4±0.9                                              | 7.8±0.8        | 6.3±0.3       | 5.1±0.7        | 4.7±0.7       |
| Sulfamethoxazole | 810±20                                               | 750±20         | 730±10        | 750±10         | 710±20        |
| Carbamazepine    | 110±10                                               | 110±10         | 120±10        | 110±10         | 110±10        |

<sup>a</sup>Average ± standard error of the mean of 10 samples measured at each sample location in the wetland during the week of August, 20<sup>th</sup> 2012. See Figure SI 8 for plot of data.

139 **Table SI 3. Wetland Temperatures<sup>a</sup>**

| <b>Month</b> | <b>Average Temperature (°C)</b> |
|--------------|---------------------------------|
| January      | 8.6±0.4                         |
| February     | 9.8±0.3                         |
| March        | 11.9±0.3                        |
| April        | 14.4±1.0                        |
| May          | 16.8±0.7                        |
| June         | 20.0±0.3                        |
| July         | 22.0±0.2                        |
| August       | 22.3±0.4                        |
| September    | 21.7±0.5                        |
| October      | 17.5±0.3                        |
| November     | 12.4±0.5                        |
| December     | 9.3±0.3                         |

140 <sup>a</sup> Average monthly temperatures reported in Livermore, CA from 2007-2012 ± standard error of the mean.<sup>10</sup>

141



142 **Table SI 4.** Sorbed Test Compound Concentrations in Open-Water Wetland<sup>a</sup>

| <b><u>Compound</u></b> | <b><u>Concentration sorbed</u></b><br><b><u>(<math>\mu\text{g kg}^{-1}</math>)</u></b> |               |               | <b><u>Concentration sorbed</u></b><br><b><u>(<math>\mu\text{g (kg organic carbon)}^{-1}</math>)</u></b> <sup>b</sup> |               |               | <b><u>Predicted aqueous concentration</u></b><br><b><u>(<math>\text{ng L}^{-1}</math>)</u></b> <sup>c</sup> |               |               |
|------------------------|----------------------------------------------------------------------------------------|---------------|---------------|----------------------------------------------------------------------------------------------------------------------|---------------|---------------|-------------------------------------------------------------------------------------------------------------|---------------|---------------|
|                        | <i>Inlet</i>                                                                           | <i>Middle</i> | <i>Outlet</i> | <i>Inlet</i>                                                                                                         | <i>Middle</i> | <i>Outlet</i> | <i>Inlet</i>                                                                                                | <i>Middle</i> | <i>Outlet</i> |
| Atenolol               | 0.2±0.1                                                                                | 0.6±0.1       | 0.5±0.0       | 2.9±1.0                                                                                                              | 1.9±0.3       | 1.6±0.1       | 22±8                                                                                                        | 12±3          | 12±1          |
| Metoprolol             | 1.9±0.4                                                                                | 11.3±0.9      | 6.6±0.7       | 34±16                                                                                                                | 37±3          | 24±3          | 85±40                                                                                                       | 83±11         | 59±10         |
| Propranolol            | 14±6                                                                                   | 69±13         | 38±12         | 210±40                                                                                                               | 230±50        | 140±50        | 57±12                                                                                                       | 52±13         | 37±14         |
| Trimethoprim           | 0.2±0.2                                                                                | 1.4±1.3       | 0.5±0.1       | 5.1±3.5                                                                                                              | 4.7±4.4       | 1.8±0.3       | 24±17                                                                                                       | 20±21         | 8.5±1.5       |
| Sulfamethoxazole       | 1.8±0.9                                                                                | 2.2±0.8       | 5.7±1.2       | 25±3                                                                                                                 | 7.4±2.5       | 20±5          | 1220±190                                                                                                    | 620±140       | 980±250       |
| Carbamazepine          | 0.7±0.3                                                                                | 3.0±1.0       | 2.3±0.1       | 10±1                                                                                                                 | 10±3          | 8.1±0.7       | 130±20                                                                                                      | 130±40        | 100±10        |

143 <sup>a</sup> Average ± one standard deviation. <sup>b</sup>Normalized based on percent organic carbon contents: inlet 7.2±3.7% organic carbon; inlet 30.2±0.2% organic carbon; inlet  
144 28.3±1.3% organic carbon. <sup>c</sup>Aqueous concentration predicted based on organic carbon-normalized concentrations and log K<sub>oc</sub> values measured in autoclaved test  
145 tubes containing wetland biomass (see Supporting Information Figure SI 2) according to:  $C_{\text{aq}} = C_{\text{sorb}}/K_{\text{oc}}$ .

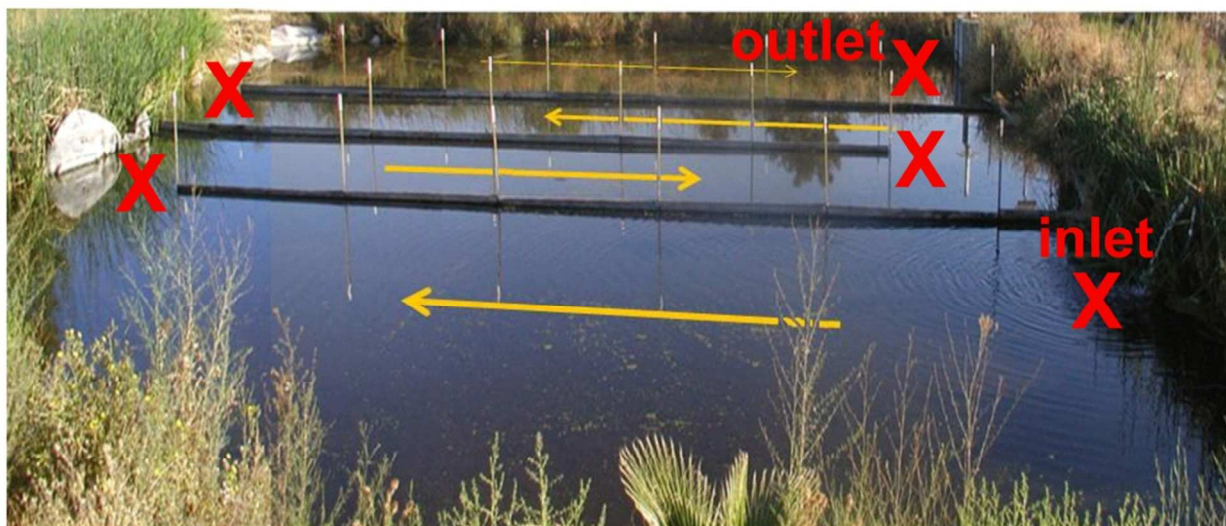

**Figure SI 1.** Photograph of the pilot-scale open-water unit process cell, located in Discovery Bay, CA (37.9°N, 121.6°W). Arrows indicate flow direct and **X** indicates sampling location.

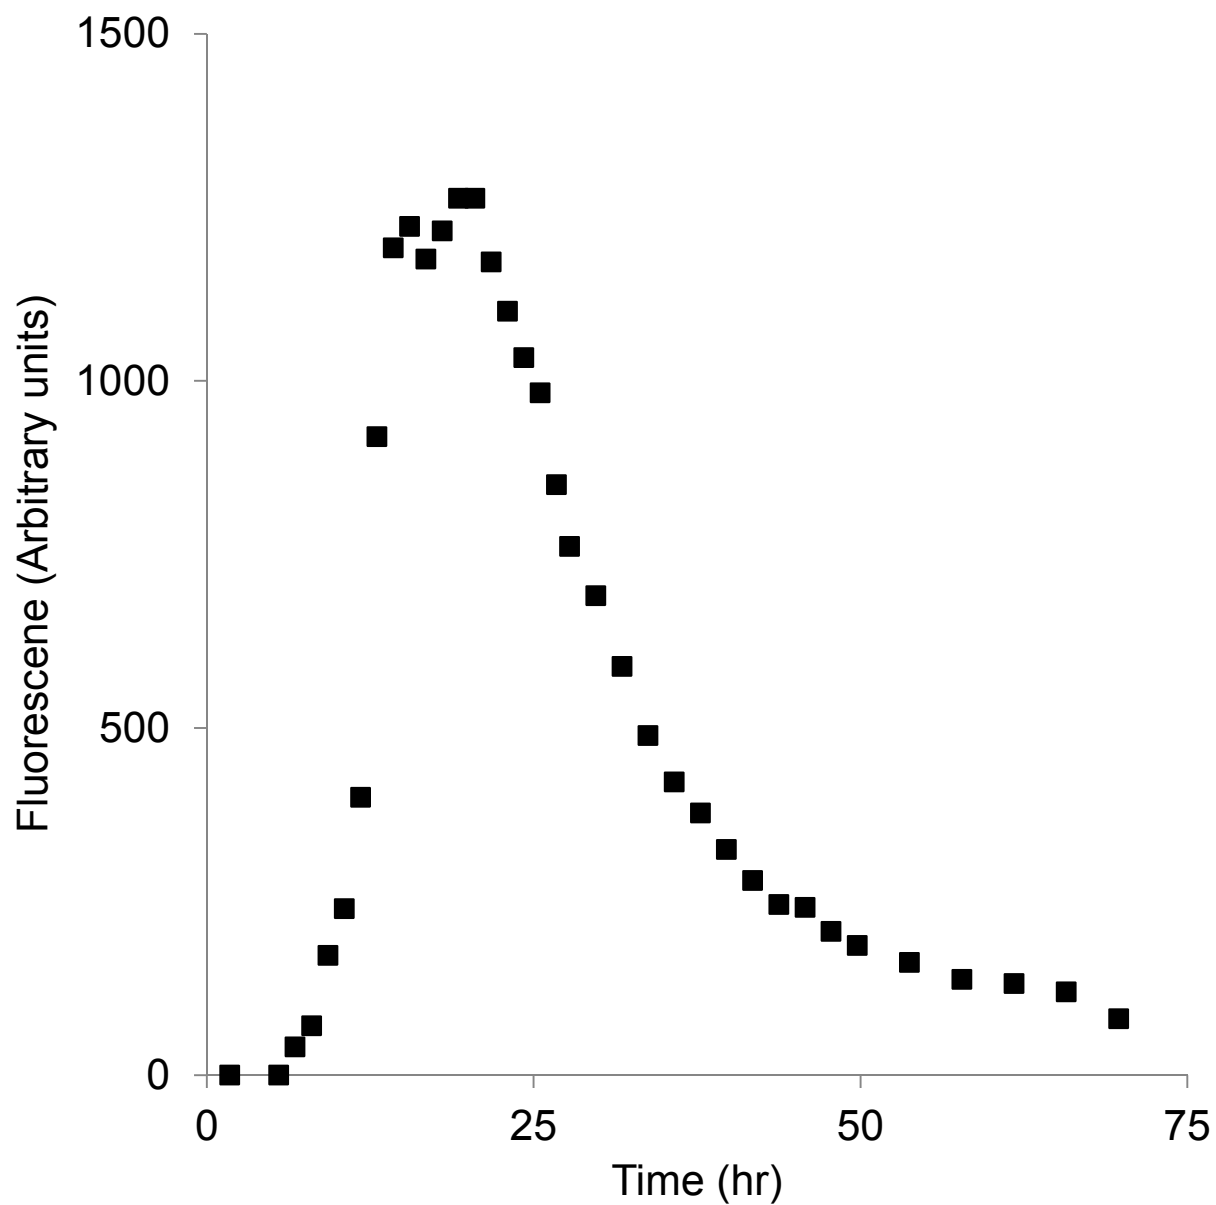

**Figure SI 2.** Breakthrough curve of rhodamine-WT in a tracer test in the pilot-scale open-water cell. Rhodamine-WT was injected at cell inlet at 0 hours and samples were collected at the cell outlet and analyzed by fluorometry (Turner TD 700). The center of mass was calculated to be 27 hours. The flow into the cell was  $1.9 \times 10^{-2}$  MGD ( $8.1 \times 10^{-4} \text{ m}^3 \text{ s}^{-1}$ ).

157

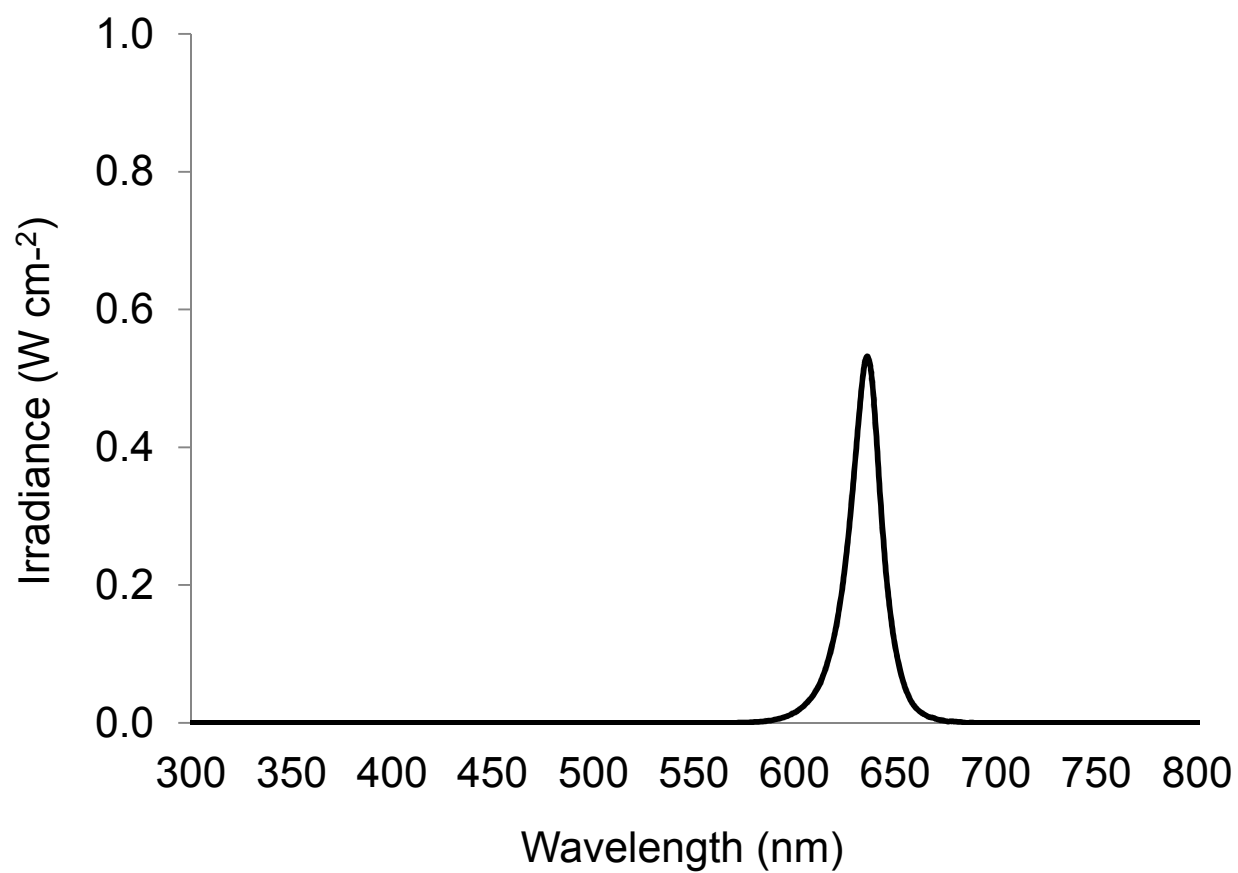

158

159 **Figure SI 3.** Spectrum of the red lamp used in microcosm experiments measured with a  
160 spectroradiometer (Stellarnet).

161

162

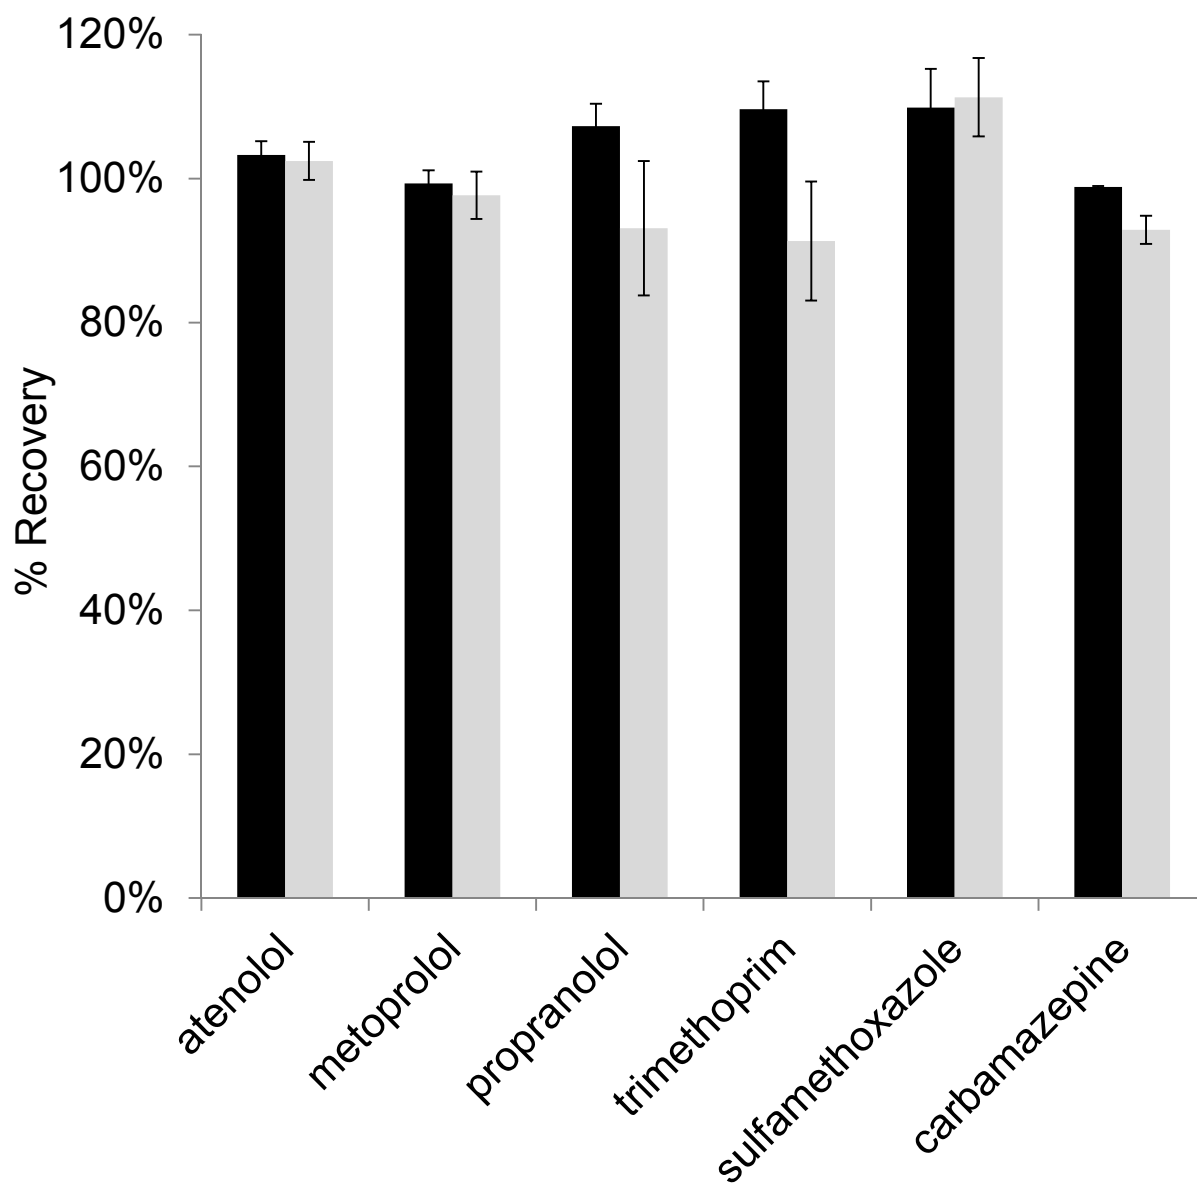

**Figure SI 4.** Percent mass recovery of test compounds amended to reactors containing autoclaved wetland biomass ( $13 \text{ g L}^{-1}$ ) maintained at pH 8.7 (black) and pH 10.0 (gray) by buffering with 20 mM borate. Reactors were gently mixed in triplicate on a rotisserie for 2 hours at  $4^\circ\text{C}$  in the dark prior to extraction. Error bars represent  $\pm$  one standard deviation.

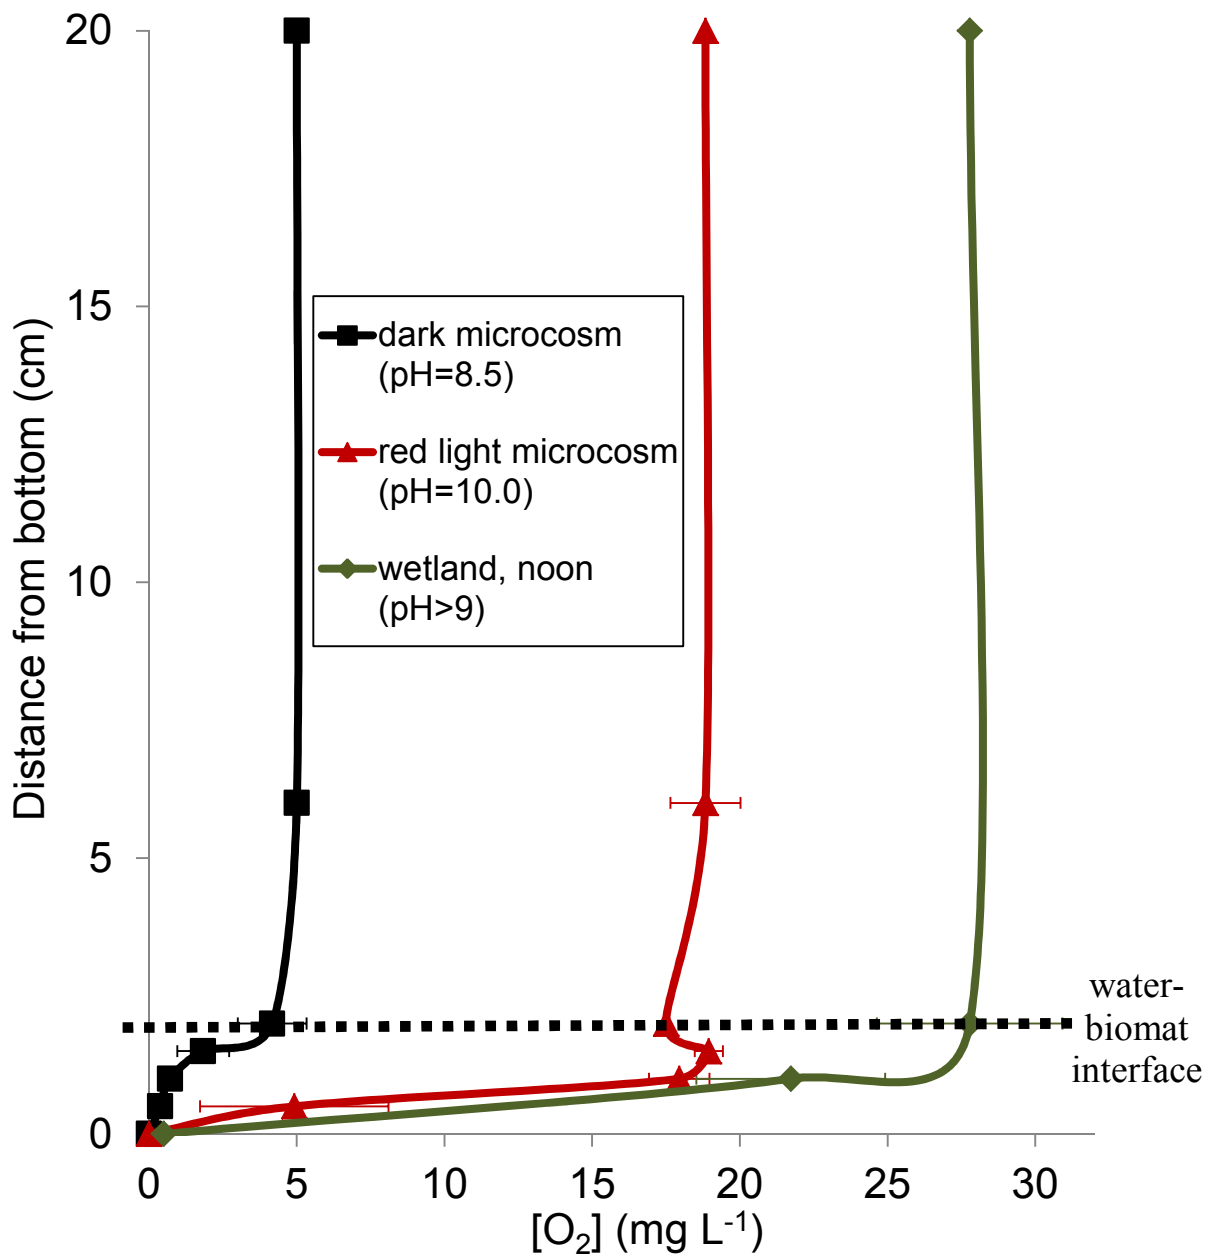

**Figure SI 5.** Dissolved oxygen profiles in microcosms and at the pilot-scale open-water cell (4-17-13) measured with a micro dissolved oxygen probe (Lazar Research Laboratories). Error bars represent  $\pm$  one standard deviation.

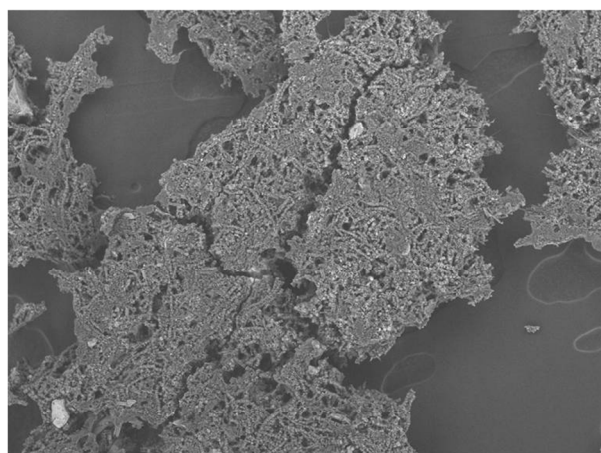

TM-1000\_3900 2012/10/04 18:18 D2.1 x180 500 um

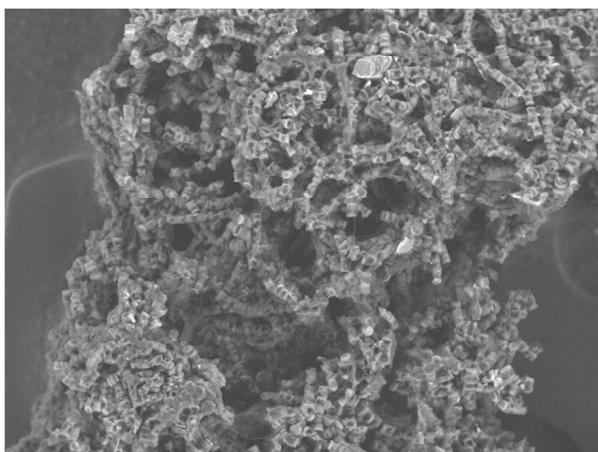

TM-1000\_3895 2012/10/04 18:00 D2.0 x600 100 um

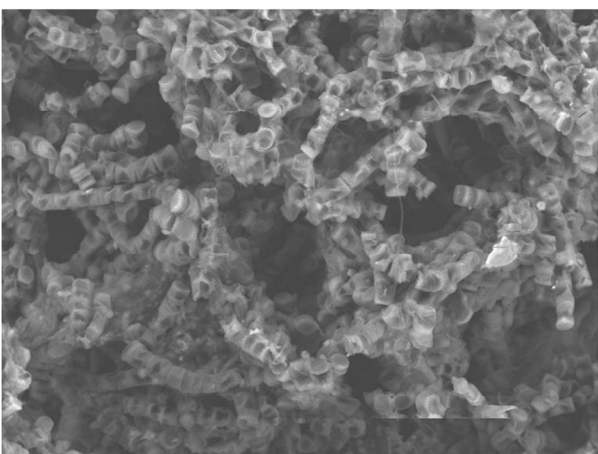

TM-1000\_3896 2012/10/04 18:03 D2.0 x1.2k 50 um

174

175 **Figure SI 6.** Scanning electron microscopy of wetland biomat at 180X (top), 600X (middle),

176 and 1200X (bottom) magnification.

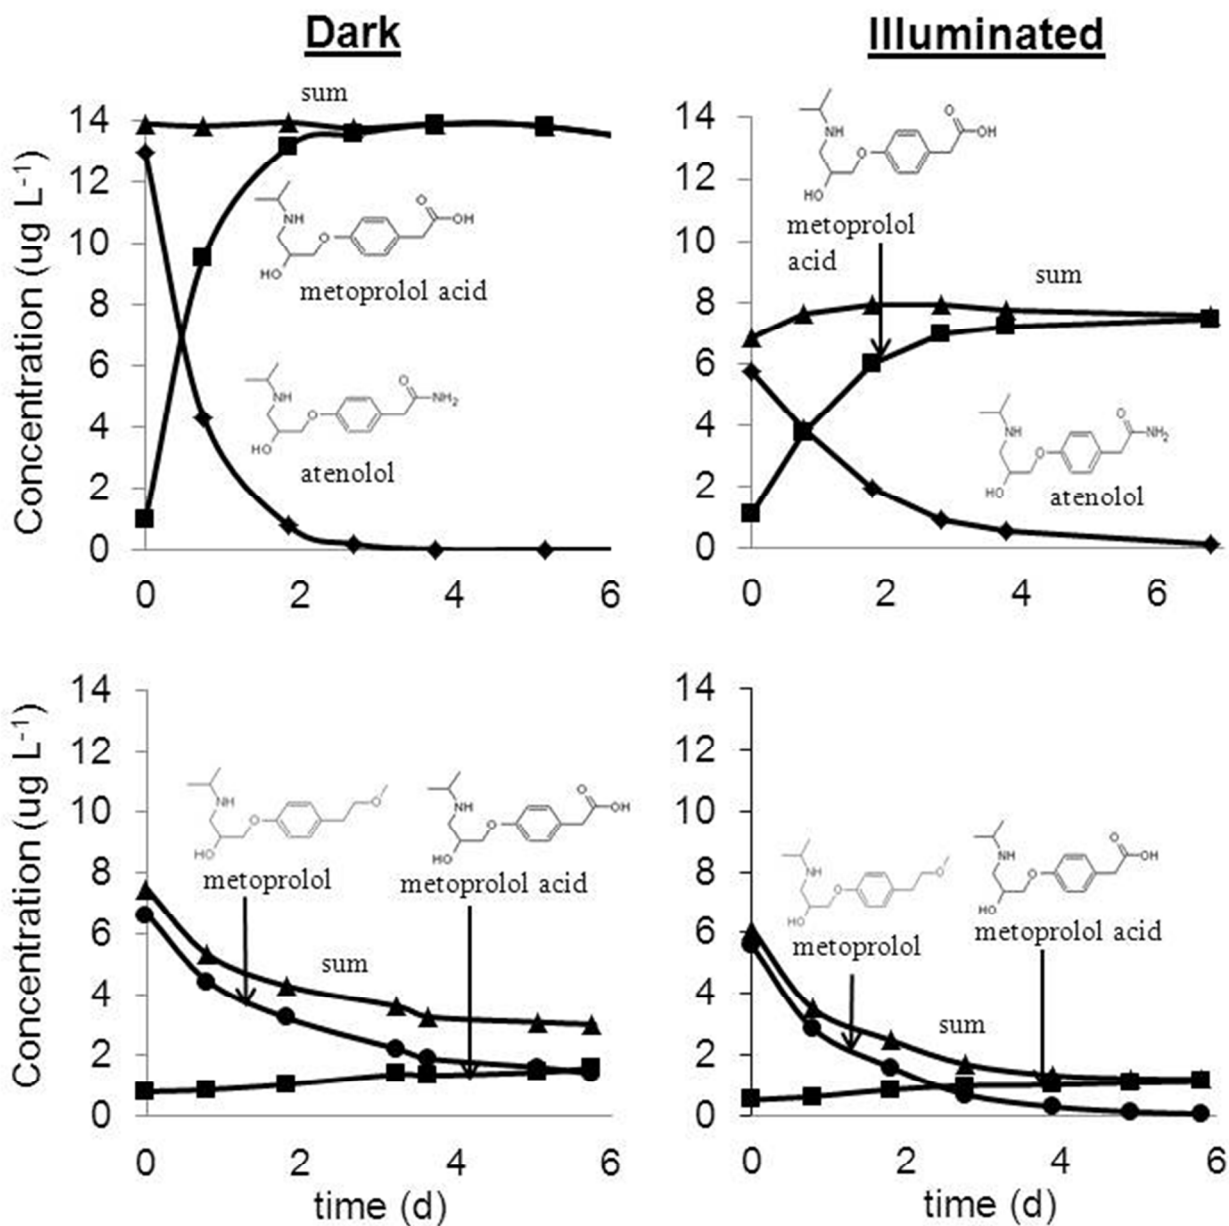

177

178 **Figure SI 7.** Formation of the biotransformation product metoprolol acid (■) in dark (left) and

179 illuminated (635 nm visible light; right) microcosms amended with either atenolol (top; ◆) or

180 metoprolol (bottom; ●). The sum of the concentrations of the parent products and the

181 transformation products are also shown (▲). Sorption accounted for loss of less than 1% of the

182 initial mass of atenolol and from 5% (illuminated microcosm) to 20% (dark microcosm) of the

183 initial concentration of metoprolol.



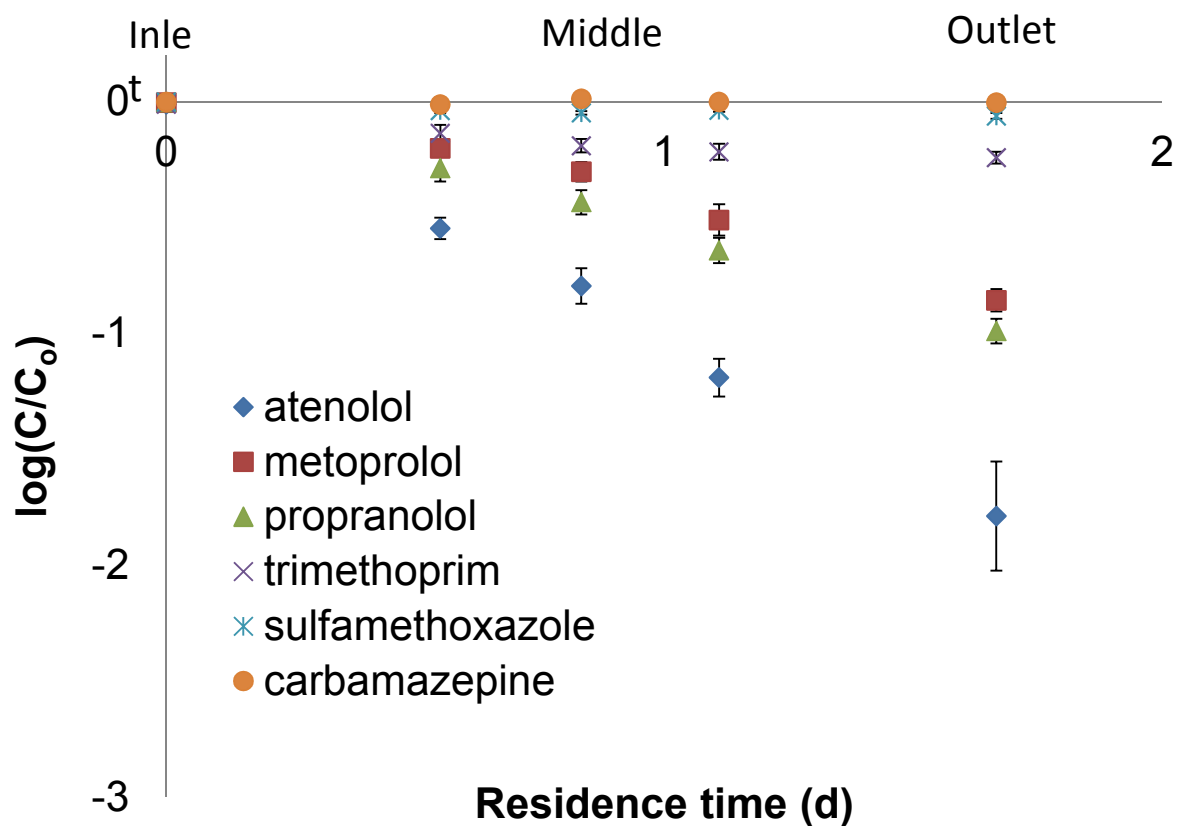

**Figure SI 8.** Removal of test compounds in pilot-scale open-water wetland during August 2012.

Error bars represent  $\pm$  standard error of the mean (n=10).

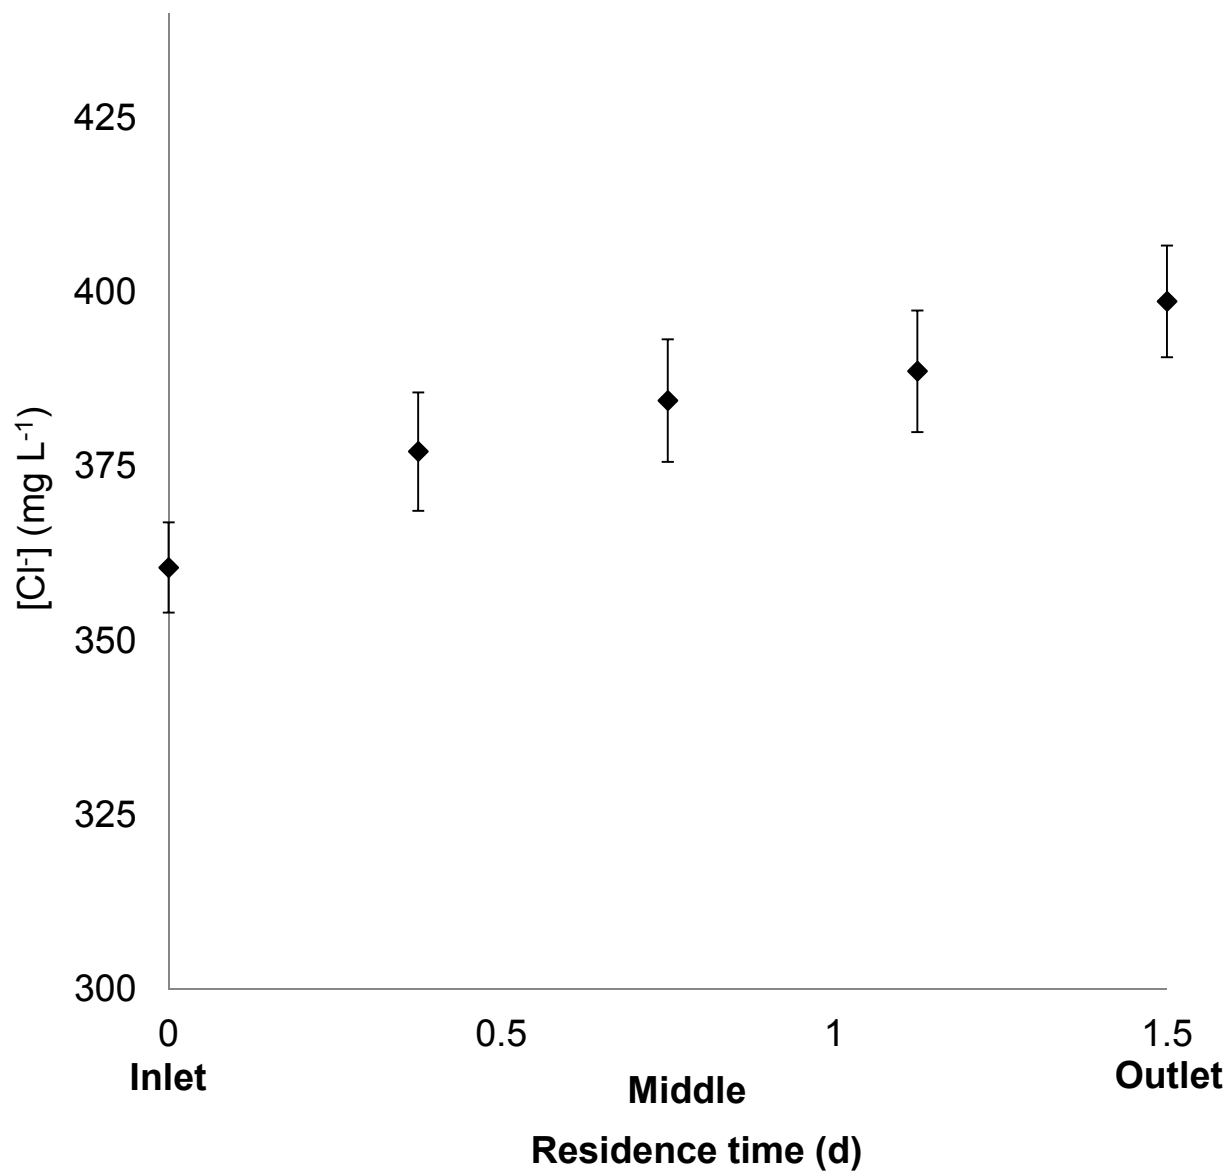

188  
189

190 **Figure SI 9.** Average  $\text{Cl}^-$  concentrations throughout pilot-scale open-water cell during summer  
191 2013. Error bars represent  $\pm$  standard error of the mean.

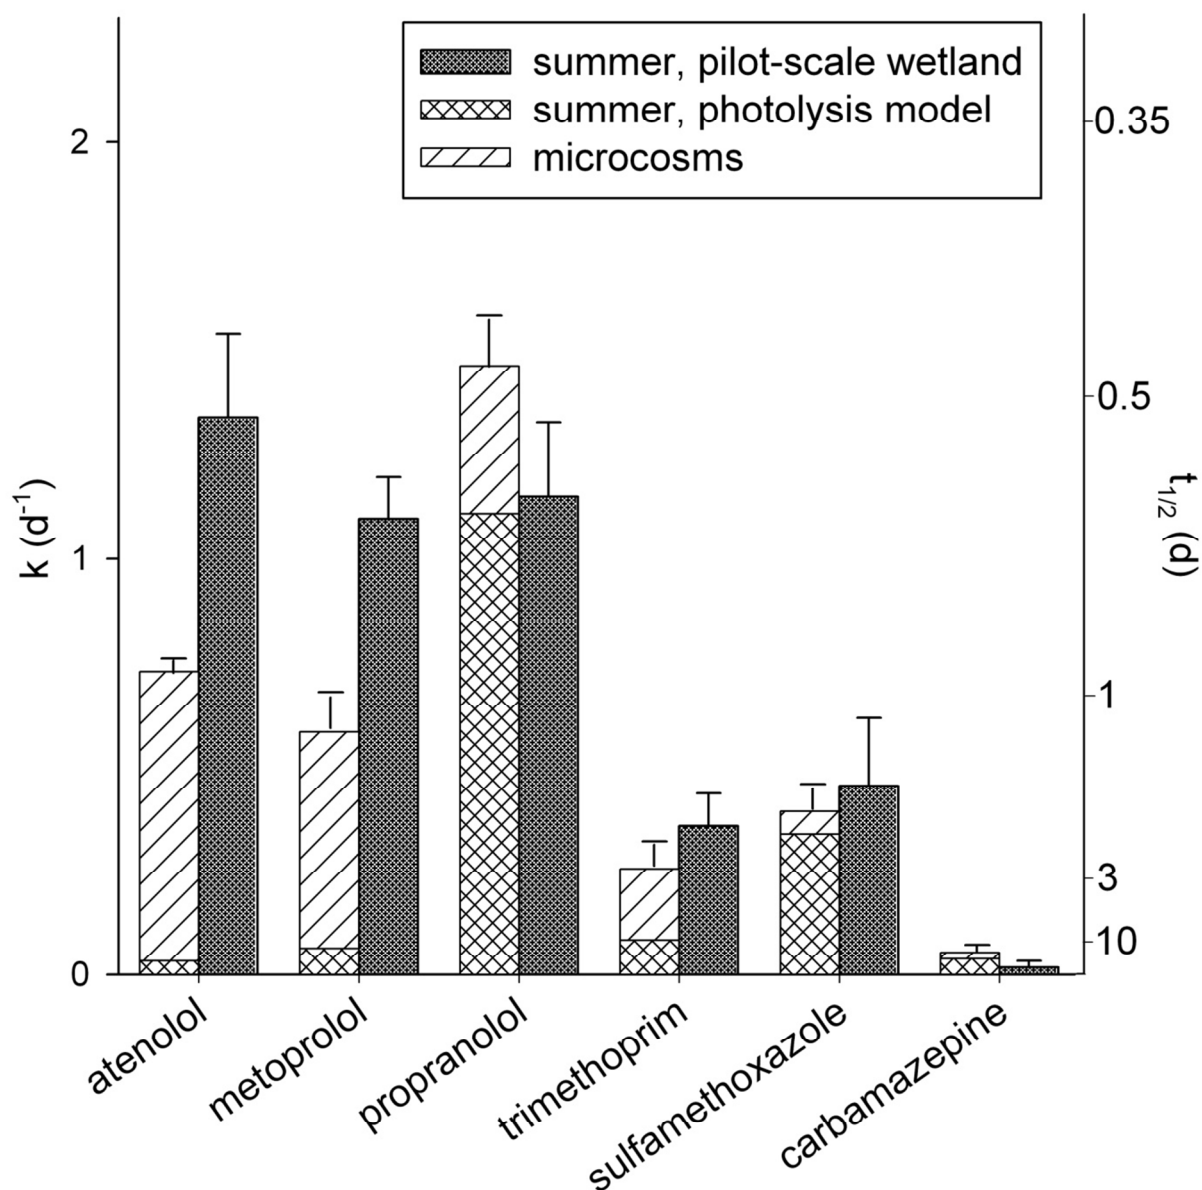

**Figure SI 10.** Comparison of measured or predicted removal rates of test compounds to removal rates observed in the Discovery Bay pilot-scale open-water wetland during summer, corrected for evaporation. Photolysis rates were corrected assuming 25% of the hydraulic residence time was spent in the biomat and that 7% of the water evaporated per day (see Figure SI 9). Error bars represent  $\pm$  one standard deviation for photolysis model and microcosms and  $\pm$  standard error of the mean for pilot-scale wetland.

## References

- (1) Hamady, M; Walker, JJ; Harris, JK; Gold, NJ; Knight, R. Error-correcting barcoded primers for pyrosequencing hundreds of samples in multiplex. *Nat. Methods*. **2008**, 5 (3), 235–237.
- (2) Caporaso, JG; Lauber, CL; Walters, WA; Berg-Lyons, D; Huntley, J; Fierer, N; Owens, SM; Betley, J; Fraser, L; Bauer, M; Gormley, N; Gilbert, JA; Smith, G; Knight, R. Ultra-high-throughput microbial community analysis on the Illumina HiSeq and MiSeq platforms. *ISME J*. **2012**, 6 (8), 1621–1624.
- (3) Aronesty, E. *ea-utils: Command-line tools for processing biological sequencing data.*; 2011.
- (4) Pearson, WR; Wood, T; Zhang, Z; Miller, W. Comparison of DNA sequences with protein sequences. *Genomics*. **1997**, 46 (1), 24–36.
- (5) Caporaso, JG; Kuczynski, J; Stombaugh, J; Bittinger, K; Bushman, FD; Costello, EK; Fierer, N; Peña, AG; Goodrich, JK; Gordon, JI; Huttley, GA; Kelley, ST; Knights, D; Koenig, JE; Ley, RE; Lozupone, CA; McDonald, D; Muegge, BD; Pirrung, M; Reeder, J; Sevinsky, JR; Turnbaugh, PJ; Walters, WA; Widmann, J; Yatsunenko, T; Zaneveld, J; Knight, R. QIIME allows analysis of high-throughput community sequencing data. *Nat. Methods*. **2010**, 7 (5), 335–336.
- (6) Edgar, RC. Search and clustering orders of magnitude faster than BLAST. *Bioinformatics*. **2010**, 26 (19), 2460–2461.
- (7) DeSantis, TZ; Hugenholtz, P; Larsen, N; Rojas, M; Brodie, EL; Keller, K; Huber, T; Dalevi, D; Hu, P; Andersen, GL. Greengenes, a Chimera-Checked 16S rRNA Gene Database and Workbench Compatible with ARB. *Appl. Environ. Microbiol.* **2006**, 72 (7), 5069–5072.
- (8) Caporaso, JG; Bittinger, K; Bushman, FD; DeSantis, TZ; Andersen, GL; Knight, R. PyNAST: a flexible tool for aligning sequences to a template alignment. *Bioinformatics*. **2009**, 26 (2), 266–267.
- (9) Sherwood, AR; Presting, GG. Universal primers amplify a 23S rDNA plastid marker in eukaryotic algae and cyanobacteria. *J. Phycol.* **2007**, 43 (3), 605–608.
- (10) Metar. Weather history for Livermore, CA. **2013**. Available at: <http://www.wunderground.com/history/airport/KLVK>. Accessed December 17, 2013.
